# Supplementary material for: Prognostic Implications of Left Ventricular Ejection Fraction and Left Ventricular End-Diastolic Diameter on Clinical Outcomes in Patients with ICD
Source: MDPI journal article supplement (doi:10.3390/jcdd9120421), 2022-11-28
Supplement: s1 [file s1]

# **SUPPLEMENTAL MATERIAL**

## **Prognostic Implications of Left Ventricular Ejection Fraction and Left Ventricular End-Diastolic Diameter on Clinical Outcomes in Patients with ICD**

**Authors:** Sijing Cheng, MD\*; Yu Deng, MD\*; Hao Huang, MD; Xi Liu, MD; Yu Yu, MD; Xuhua Chen, MD; Min Gu, MD; Hongxia Niu, MD; Wei Hua, MD, PhD, FHRS

\* contributed equally

**Affiliation:** The Cardiac Arrhythmia Center, State Key Laboratory of Cardiovascular Disease, Fuwai Hospital, National Center for Cardiovascular Diseases, Chinese Academy of Medical Sciences and Peking Union Medical College, No.167 North Lishi Road, Beijing 100037, China

### **Correspondence:**

Wei Hua, PhD

State Key Laboratory of Cardiovascular Disease, Arrhythmia Center, Fuwai Hospital, National Center for Cardiovascular Diseases, Chinese Academy of Medical Sciences and Peking Union Medical College, No.167 North Lishi Road, Beijing 100037, China

E-mail: drhuaweifw@sina.com

Table S1. Baseline characteristics of the study population according to the LVEF and LVDD quintiles

|                            | LVEF       |            |            |            |            |         | LVDD       |            |            |            |            |         |
|----------------------------|------------|------------|------------|------------|------------|---------|------------|------------|------------|------------|------------|---------|
|                            | Q1         | Q2         | Q3         | Q4         | Q5         | P value | Q1         | Q2         | Q3         | Q4         | Q5         | P value |
|                            | <27%       | 27-33%     | 33-38%     | 38-48%     | ≥48%       |         | <57mm      | 57-61mm    | 61-66mm    | 66-72mm    | ≥72mm      |         |
|                            | N=126      | N=122      | N=125      | N=128      | N=129      |         | N=121      | N=109      | N=141      | N=131      | N=128      |         |
| Age, years                 | 57.3(12.4) | 59.8(12.0) | 62.5(10.7) | 62.0(12.1) | 61.8(11.3) | 0.002*  | 63.4(11.4) | 61.6(12.7) | 60.7(11.1) | 60.5(11.8) | 57.6(11.8) | 0.003*  |
| Male                       | 101(80.2%) | 103(84.4%) | 109(87.2%) | 107(83.6%) | 107(82.9%) | 0.667   | 90(74.4%)  | 87(79.8%)  | 120(85.1%) | 118(90.1%) | 112(87.5%) | 0.006*  |
| BMI, kg/m <sup>2</sup>     | 24.4(3.82) | 25.2(3.86) | 24.8(3.10) | 25.0(3.26) | 25.0(3.74) | 0.391   | 24.3(3.82) | 24.9(3.46) | 24.8(3.14) | 25.0(3.33) | 25.5(4.02) | 0.149   |
| Smoking                    | 69(54.8%)  | 66(54.1%)  | 70(56.0%)  | 69(53.9%)  | 84(65.1%)  | 0.322   | 70(57.9%)  | 60(55.0%)  | 73(51.8%)  | 84(64.1%)  | 71(55.5%)  | 0.331   |
| Alcohol                    | 55(43.7%)  | 51(41.8%)  | 47(37.6%)  | 49(38.3%)  | 60(46.5%)  | 0.574   | 41(33.9%)  | 52(47.7%)  | 50(35.5%)  | 66(50.4%)  | 53(41.4%)  | 0.027*  |
| Blood pressure             |            |            |            |            |            |         |            |            |            |            |            |         |
| Systolic, mmHg             | 114(15.6)  | 115(18.5)  | 118(14.0)  | 122(16.4)  | 127(18.5)  | <0.001* | 124(16.9)  | 123(17.8)  | 118(17.3)  | 117(15.1)  | 115(17.8)  | <0.001* |
| Diastolic, mmHg            | 71.4(10.2) | 74.0(11.9) | 72.3(9.6)  | 74.4(9.9)  | 74.8(11.5) | 0.051   | 74.9(11.4) | 74.3(9.5)  | 73.1(10.6) | 72.6(10.5) | 72.4(11.1) | 0.272   |
| NYHA functional class, >II | 79(62.7%)  | 66(54.1%)  | 59(47.2%)  | 48(37.5%)  | 21(16.3%)  | <0.001* | 29(24.0%)  | 38(34.9%)  | 60(42.6%)  | 67(51.1%)  | 79(61.7%)  | <0.001* |
| Comorbidity                |            |            |            |            |            |         |            |            |            |            |            |         |
| Diabetes                   | 29(23.0%)  | 32(26.2%)  | 25(20.0%)  | 25(19.5%)  | 28(21.7%)  | 0.718   | 23(19.0%)  | 25(22.9%)  | 35(24.8%)  | 27(20.6%)  | 29(22.7%)  | 0.824   |
| Hypertension               | 41(32.5%)  | 50(41.0%)  | 64(51.2%)  | 63(49.2%)  | 72(55.8%)  | 0.002*  | 81(66.9%)  | 58(53.2%)  | 79(56.0%)  | 69(52.7%)  | 51(39.8%)  | 0.001*  |
| AF                         | 42(33.3%)  | 42(34.4%)  | 39(31.2%)  | 28(21.9%)  | 31(24.0%)  | 0.095   | 27(22.3%)  | 34(31.2%)  | 40(28.4%)  | 43(32.8%)  | 38(29.7%)  | 0.423   |
| ICM                        | 39(31.0%)  | 55(45.1%)  | 75(60.0%)  | 78(60.9%)  | 96(74.4%)  | <0.001* | 93(76.9%)  | 67(61.5%)  | 81(57.4%)  | 63(48.1%)  | 39(30.5%)  | <0.001* |
| Stroke                     | 9(7.1%)    | 10(8.2%)   | 10(8.0%)   | 8(6.3%)    | 4(3.1%)    | 0.465   | 5(4.13%)   | 5(4.59%)   | 15(10.6%)  | 10(7.63%)  | 6(4.69%)   | 0.152   |
| Hyperlipidemia             | 47(37.3%)  | 66(54.1%)  | 71(56.8%)  | 71(55.5%)  | 83(64.3%)  | <0.001* | 81(66.9%)  | 58(53.2%)  | 79(56.0%)  | 69(52.7%)  | 51(39.8%)  | 0.001*  |
| CRBBB                      | 9(7.1%)    | 7(5.7%)    | 9(7.2%)    | 11(8.6%)   | 6(4.7%)    | 0.758   | 7(5.79%)   | 3(2.75%)   | 13(9.22%)  | 12(9.16%)  | 7(5.47%)   | 0.205   |
| CLBBB                      | 11(8.7%)   | 7(5.7%)    | 9(7.2%)    | 11(8.6%)   | 6(4.7%)    | 0.585   | 3(2.48%)   | 3(2.75%)   | 5(3.55%)   | 9(6.87%)   | 16(12.5%)  | 0.002** |

|                                 |               |               |              |              |              |         |              |              |              |               |               |         |
|---------------------------------|---------------|---------------|--------------|--------------|--------------|---------|--------------|--------------|--------------|---------------|---------------|---------|
| Primary prevention              | 54(42.9%)     | 59(48.4%)     | 32(25.6%)    | 0            | 0            | <0.001* | 3(2.48%)     | 13(11.9%)    | 35(24.8%)    | 40(30.5%)     | 54(42.2%)     | <0.001* |
| Medication                      |               |               |              |              |              |         |              |              |              |               |               |         |
| ACEI/ARB/ARNI                   | 92(73.0%)     | 90(73.8%)     | 94(75.2%)    | 99(77.3%)    | 83(64.3%)    | 0.171   | 81(66.9%)    | 83(76.1%)    | 107(75.9%)   | 97(74.0%)     | 90(0.3%)      | 0.422   |
| β-blocker                       | 97(77.0%)     | 98(80.3%)     | 101(80.8%)   | 113(88.3%)   | 108(83.7%)   | 0.185   | 103(85.1%)   | 95(87.2%)    | 117(83.0%)   | 107(81.7%)    | 95(74.2%)     | 0.087   |
|                                 |               |               |              |              |              |         | )            |              |              |               |               |         |
| Digoxin                         | 54(42.9%)     | 43(35.2%)     | 35(28.0%)    | 21(16.4%)    | 13(10.1%)    | <0.001* | 12(9.92%)    | 22(20.2%)    | 40(28.4%)    | 40(30.5%)     | 52(40.6%)     | <0.001* |
| Diuretic                        | 115(91.3%)    | 105(86.1%)    | 104(83.2%)   | 92(71.9%)    | 55(42.6%)    | <0.001* | 58(47.9%)    | 77(70.6%)    | 109(77.3%)   | 109(83.2%)    | 118(92.2%)    | <0.001* |
| Amiodarone                      | 37(29.4%)     | 25(20.5%)     | 39(31.2%)    | 56(43.8%)    | 60(46.5%)    | <0.001* | 54(44.6%)    | 42(38.5%)    | 45(31.9%)    | 44(33.6%)     | 32(25.0%)     | 0.018*  |
| Biomarker                       |               |               |              |              |              |         |              |              |              |               |               |         |
| NT-proBNP <sup>a</sup> , pg/ml  | 1591(811,379) | 1286(705,247) | 942(428,176) | 708(331,166) | 473(233,880) | <0.001* | 578(250,127) | 697(308,138) | 970(615,186) | 1075(502,228) | 1429(663,278) | <0.001* |
| eGFR, ml/min/1.73m <sup>2</sup> | 79.9(20.6)    | 77.6(24.0)    | 74.4(24.8)   | 76.5(25.0)   | 83.7(22.6)   | 0.021*  | 82.8(24.9)   | 80.5(23.8)   | 76.2(22.3)   | 74.9(22.7)    | 78.7(24.0)    | 0.057   |
| Albumin, g/L                    | 41.9(4.60)    | 41.8(4.60)    | 41.4(5.38)   | 41.6(5.40)   | 40.8(4.76)   | 0.390   | 41.5(4.82)   | 41.2(5.38)   | 41.2(5.52)   | 41.7(4.50)    | 42.0(4.54)    | 0.639   |

Values are n (%) or mean (standard deviation) where appropriate.

\* denotes P<0.05.

<sup>a</sup>NT-proBNP was presented as median (IQR).

AF, atrial fibrillation; ARNI, angiotensin receptor-neprilysin inhibitor; BMI, body mass index; CLBBB, complete left bundle branch block; CRBBB, complete right bundle branch block; eGFR, estimated glomerular filtration rate; ICM, ischemic cardiomyopathy; LVEDD, left ventricular end-diastolic diameter; LVEF, left ventricular ejection fraction.

Table S2. Univariable Cox regression for the prediction of all-cause mortality and appropriate shock.

|                                | All-cause mortality |         | Shock           |         |
|--------------------------------|---------------------|---------|-----------------|---------|
|                                | HR (95%CI)          | P value | HR (95%CI)      | P value |
| Age, years                     | 1.01(0.99-1.02)     | 0.23    | 0.99(0.97-1)    | 0.026*  |
| Female                         | 1.11(0.75-1.64)     | 0.60    | 0.57(0.36-0.92) | 0.021*  |
| BMI, kg/m <sup>2</sup>         | 0.97(0.92-1.01)     | 0.97    | 0.98(0.94-1.03) | 0.415   |
| Alcohol                        | 0.85(0.62-1.16)     | 0.31    | 1.57(1.16-2.12) | 0.003*  |
| Smoking                        | 0.94(0.70-1.28)     | 0.71    | 1.40(1.03-1.91) | 0.033*  |
| Systolic BP, mmHg              | 0.98(0.97-0.99)     | <0.001* | 0.99(0.98-1.00) | 0.069   |
| NYHA functional class, >II     | 2.25(1.65-3.07)     | <0.001* | 0.99(0.73-1.34) | 0.95    |
| NSVT                           | 0.97(0.62-1.52)     | 0.88    | 1.16(0.77-1.75) | 0.48    |
| Primary prevention             | 1.30(0.91-1.85)     | 0.16    | 0.89(0.61-1.32) | 0.57    |
| ICM                            | 0.83(0.61-1.12)     | 0.22    | 0.57(0.42-0.77) | <0.001* |
| Diabetes                       | 1.4(0.98-2)         | 0.061   | 0.83(0.57-1.22) | 0.352   |
| AF                             | 1.3(0.94-1.79)      | 0.12    | 1.13(0.82-1.56) | 0.46    |
| Hyperlipidemia                 | 0.89(0.66-1.21)     | 0.46    | 0.72(0.53-0.97) | 0.031*  |
| Stroke                         | 0.94(0.48-1.85)     | 0.87    | 1.00(0.50-1.97) | 0.99    |
| CRBBB                          | 2.24(1.42-3.55)     | 0.001*  | 0.48(0.22-1.03) | 0.06    |
| Amiodarone                     | 1(0.73-1.36)        | 0.996   | 0.86(0.63-1.17) | 0.33    |
| ACEI/ARB/ARNI                  | 0.57(0.42-0.78)     | <0.001* | 0.98(0.7-1.36)  | 0.90    |
| β-blocker                      | 0.82(0.58-1.17)     | 0.28    | 1.26(0.87-1.82) | 0.22    |
| Digoxin                        | 1.52(1.11-2.08)     | 0.01*   | 0.79(0.55-1.12) | 0.18    |
| Diuretic                       | 1.46(0.99-2.13)     | 0.053   | 1.03(0.73-1.45) | 0.87    |
| NT-proBNP <sup>a</sup> , pg/ml | 4.26(3.00-6.06)     | <0.001* | 1.01(0.73-1.40) | 0.94    |

|                                 |                 |         |                 |        |
|---------------------------------|-----------------|---------|-----------------|--------|
| eGFR, ml/min/1.73m <sup>2</sup> | 0.99(0.98-1)    | 0.005*  | 1.00(0.99-1.01) | 0.74   |
| Albumin, g/L                    | 0.96(0.94-0.99) | 0.01*   | 1.00(0.96-1.03) | 0.91   |
| LVEF quintiles                  |                 |         |                 |        |
| Q1                              | Ref             | -       | Ref             | -      |
| Q2                              | 0.59(0.38-0.92) | 0.02*   | 1.35(0.74-2.13) | 0.192  |
| Q3                              | 0.65(0.42-0.99) | 0.046*  | 0.97(0.60-1.57) | 0.904  |
| Q4                              | 0.47(0.30-0.75) | 0.001*  | 1.15(0.73-1.82) | 0.539  |
| Q5                              | 0.30(0.18-0.51) | <0.001* | 0.74(0.44-1.23) | 0.245  |
| LVEDD quintiles                 |                 |         |                 |        |
| Q1                              | 0.32(0.19-0.53) | <0.001* | 0.53(0.31-0.88) | 0.015* |
| Q2                              | 0.49(0.31-0.79) | 0.003*  | 0.53(0.32-0.88) | 0.015* |
| Q3                              | 0.41(0.26-0.64) | <0.001* | 0.78(0.52-1.17) | 0.238  |
| Q4                              | 0.61(0.40-0.93) | 0.02*   | 0.86(0.57-1.30) | 0.479  |
| Q5                              | Ref             | -       | Ref             | -      |
| LVEF, %                         | 0.96(0.95-0.98) | <0.001* | 0.99(0.98-1.00) | 0.17   |
| LVEDD, mm                       | 1.05(1.03-1.06) | <0.001* | 1.02(1.00-1.04) | 0.006* |

\* denotes P<0.05.

<sup>a</sup>NT-proBNP was included as a continuous log<sub>10</sub>-transformed value.

AF, atrial fibrillation; ARNI, angiotensin receptor-neprilysin inhibitor; BMI, body mass index; CRBBB, complete right bundle branch block; eGFR, estimated glomerular

filtration rate; ICM, ischemic cardiomyopathy; LVEDD, left ventricular end-diastolic diameter; LVEF, left ventricular ejection fraction.

Table S3 multivariable regression results according to echo parameter quintiles and clinical outcomes in model 4

|                                 | All-cause mortality |                 | Shock           |                 |
|---------------------------------|---------------------|-----------------|-----------------|-----------------|
|                                 | LVEF                | LVEDD           | LVEF            | LVEDD           |
| Age, years                      | 1.00(0.99-1.02)     | 1.01(0.99-1.02) | 0.99(0.98-1.01) | 0.99(0.98-1.01) |
| Female                          | 0.91(0.60-1.39)     | 0.88(0.56-1.37) | 0.66(0.38-1.14) | 0.69(0.40-1.19) |
| Smoking                         | -                   | -               | 1.39(0.97-2.01) | 1.25(0.87-1.81) |
| Alcohol                         | -                   | -               | 1.28(0.90-1.81) | 1.34(0.94-1.91) |
| BMI, kg/m <sup>2</sup>          | 1.01(0.96-1.06)     | 1.00(0.95-1.05) | 0.97(0.93-1.01) | 0.97(0.92-1.01) |
| Systolic BP, mmHg               | 0.99(0.98-1.00)     | 0.99(0.98-1.00) | 1.00(0.99-1.01) | 1.00(0.99-1.00) |
| NYHA functional class, > II     | 1.66(1.18-2.33)     | 1.65(1.17-2.32) | 0.99(0.70-1.41) | 0.96(0.68-1.36) |
| Primary prevention              | 0.80(0.86-1.33)     | 0.87(0.59-1.29) | 0.76(0.48-1.20) | 0.73(0.48-1.12) |
| CRBBB                           | 2.13(1.31-3.47)     | 2.32(1.42-3.79) | 0.60(0.29-1.27) | 0.58(0.28-1.22) |
| AF                              | 1.01(0.70-1.45)     | 1.03(0.72-1.47) | 1.04(0.75-1.45) | 1.13(0.82-1.57) |
| Diabetes                        | 1.43(0.99-2.07)     | 1.40(0.97-2.03) | 0.91(0.61-1.34) | 0.89(0.61-1.31) |
| ICM                             | 0.92(0.65-1.31)     | 0.98(0.69-1.40) | 0.52(0.36-0.74) | 0.56(0.39-0.78) |
| Digoxin                         | 1.12(0.78-1.59)     | 1.12(0.79-1.60) | 0.66(0.44-0.99) | 0.62(0.41-0.92) |
| Diuretic                        | 1.16(0.56-1.32)     | 0.88(0.57-1.35) | 0.95(0.65-1.38) | 0.97(0.68-1.39) |
| ACEI/ARB/ARNI                   | 0.70(0.50-0.99)     | 0.70(0.50-0.99) | 0.97(0.68-1.38) | 1.02(0.72-1.43) |
| eGFR, ml/min/1.73m <sup>2</sup> | 0.99(0.99-1.00)     | 0.99(0.99-1.00) | 1.00(0.99-1.00) | 1.00(0.99-1.01) |
| Albumin                         | 0.97(0.94-1.00)     | 0.97(0.94-0.99) | 0.99(0.96-1.03) | 1.00(0.97-1.04) |
| NT-proBNP, pg/ml                | 1.00(1.00-1.00)     | 1.00(1.00-1.00) | 1.00(1.00-1.00) | 1.00(1.00-1.00) |

AF, atrial fibrillation; ARNI, angiotensin receptor-neprilysin inhibitor; BMI, body mass index; CRBBB, complete right bundle branch block; eGFR, estimated glomerular

filtration rate; ICM, ischemic cardiomyopathy; LVEDD, left ventricular end-diastolic diameter; LVEF, left ventricular ejection fraction.

Table S4. Statistical association of baseline variables with all-cause mortality and appropriate shock

|                            | All-cause mortality  |                          |         | Shock            |                      |         |
|----------------------------|----------------------|--------------------------|---------|------------------|----------------------|---------|
|                            | Survivors<br>(N=462) | Non-survivors<br>(N=168) | P value | Treat<br>(N=156) | Non-treat<br>(N=474) | P value |
| Age, years                 | 60.3(11.4)           | 61.7(12.9)               | 0.21    | 59.2(12.2)       | 61.2(11.7)           | 0.08    |
| Male                       | 390(84.4%)           | 137(81.5%)               | 0.46    | 138(88.5%)       | 389(82.1%)           | 0.08    |
| BMI, kg/m <sup>2</sup>     | 25.1(3.52)           | 24.4(3.67)               | 0.028*  | 24.6(3.68)       | 25.0(3.53)           | 0.196   |
| Blood pressure             |                      |                          |         |                  |                      |         |
| Systolic, mmHg             | 121(16.2)            | 115(19.3)                | <0.001* | 117(15.0)        | 120(17.9)            | 0.021*  |
| Diastolic, mmHg            | 74(10.3)             | 72(11.6)                 | 0.029*  | 74(9.58)         | 73(11.0)             | 0.684   |
| NYHA functional class, >II | 174(37.7%)           | 99(58.9%)                | <0.001* | 70(44.9%)        | 203(43.8%)           | 0.72    |
| LVEF, %                    | 38.6(11.9)           | 33.7(10.2)               | <0.001* | 36.1(10.2)       | 37.7(12.1)           | 0.12    |
| LVEDD, mm                  | 63.1(9.4)            | 67.3(10.0)               | <0.001* | 66.1(9.2)        | 63.6(9.8)            | 0.004*  |
| Comorbidity                |                      |                          |         |                  |                      |         |
| Diabetes                   | 98(21.2%)            | 41(24.4%)                | 0.46    | 28(17.9%)        | 111(23.4%)           | 0.19    |
| Hypertension               | 216(46.8%)           | 74(44.0%)                | 0.61    | 63(40.4%)        | 227(47.9%)           | 0.124   |
| AF                         | 128(27.7%)           | 54(32.1%)                | 0.324   | 50(32.1%)        | 132(27.8%)           | 0.37    |
| ICM                        | 258(55.8%)           | 85(50.6%)                | 0.28    | 65(41.7%)        | 278(58.6%)           | <0.001* |
| Stroke                     | 32(6.93%)            | 9(5.36%)                 | 0.601   | 8(5.13%)         | 33(6.96%)            | 0.54    |
| Hyperlipidemia             | 256(55.4%)           | 82(48.8%)                | 0.17    | 70(44.9%)        | 268(56.5%)           | 0.015*  |
| CRBBB                      | 21(4.55%)            | 21(12.5%)                | 0.001*  | 6(3.85%)         | 36(7.59%)            | 0.149   |
| CLBBB                      | 28(6.06%)            | 8(4.76%)                 | 0.67    | 8(5.13%)         | 28(5.91%)            | 0.87    |
| Primary prevention         | 105(22.7%)           | 40(23.8%)                | 0.86    | 30(19.2%)        | 115(24.324.3%)       | 0.236   |
| Medication                 |                      |                          |         |                  |                      |         |

|                                      |               |                |         |                |               |      |
|--------------------------------------|---------------|----------------|---------|----------------|---------------|------|
| ACEI/ARB/ARNI                        | 353(76.4%)    | 105(62.5%)     | 0.001*  | 111(71.2%)     | 347(73.2%)    | 0.69 |
| Beta-blocker                         | 390(84.4%)    | 127(75.6%)     | 0.015*  | 127(81.4%)     | 390(82.3%)    | 0.90 |
| Digoxin                              | 105(22.7%)    | 61(36.3%)      | 0.001*  | 37(23.7%)      | 129(27.2%)    | 0.45 |
| Diuretic                             | 336(72.7%)    | 135(80.4%)     | 0.065   | 117(75.0%)     | 354(74.7%)    | 1.0  |
| Amiodarone                           | 151(32.7%)    | 66(39.3%)      | 0.15    | 57(35.5%)      | 160(33.8%)    | 0.59 |
| NT-proBNP <sup>a</sup> , pg/ml       | 727(345,1456) | 1840(939;3240) | <0.001* | 1014(471;2018) | 876(417;1887) | 0.24 |
| eGFR_MDRD, ml/min/1.73m <sup>2</sup> | 79.4(22.3)    | 75.9(26.8)     | 0.13    | 80.1(24.8)     | 77.9(23.2)    | 0.34 |
| Albumin, g/L                         | 41.8(5.16)    | 40.8(4.30)     | 0.016*  | 41.6(5.13)     | 41.5(4.91)    | 0.84 |

\* denotes P<0.05.

<sup>a</sup>NT-proBNP was presented as median (IQR).

AF, atrial fibrillation; ARNI, angiotensin receptor-neprilysin inhibitor; BMI, body mass index; CLBBB, complete left bundle branch block; CRBBB, complete right bundle branch block; eGFR, estimated glomerular filtration rate; ICM, ischemic cardiomyopathy; LVEDD, left ventricular end-diastolic diameter; LVEF, left ventricular ejection fraction.

Table S5. Incremental prognostic value of LVEF and LVEDD for clinical outcomes.

|                                       | Model 1         |                     |         |                     |         | Model 2         |                     |         |                     |         |
|---------------------------------------|-----------------|---------------------|---------|---------------------|---------|-----------------|---------------------|---------|---------------------|---------|
|                                       | Clinical        | Clinical + LVEF     | P value | Clinical + LVEDD    | P value | Clinical        | Clinical + LVEF     | P value | Clinical + LVEDD    | P value |
| <b>All-cause mortality</b>            |                 |                     |         |                     |         |                 |                     |         |                     |         |
| C-statistic                           | 0.65(0.60,0.70) | 0.676(0.63,0.72)    | -       | 0.68(0.63,0.73)     | -       | 0.67(0.62,0.72) | 0.69(0.64,0.73)     | -       | 0.69(0.65,0.74)     | -       |
| IDI                                   | -               | 0.017(0.003,0.040)  | 0.013   | 0.038(0.013,0.070)  | <0.001  | -               | 0.017(0.004,0.040)  | 0.02    | 0.040(0.013-0.075)  | <0.0001 |
| NRI (95%CI)                           | -               | 0.185(0.053-0.306)  | -       | 0.277(0.140-0.382)  | -       | -               | 0.124(0.006,0.249)  | -       | 0.235(0.105,0.352)  | -       |
| Likelihood-ratio test, $\Delta\chi^2$ | -               | 11.169              | 0.0008  | 23.508              | <0.0001 | -               | 10.449              | 0.001   | 23.212              | <0.0001 |
| <b>Shock</b>                          |                 |                     |         |                     |         |                 |                     |         |                     |         |
| C-statistic                           | 0.61(0.57,0.66) | 0.618(0.57,0.66)    | -       | 0.625(0.58-0.67)    | -       | 0.65(0.60,0.69) | 0.65(0.60,0.69)     | -       | 0.65(0.60,0.69)     | -       |
| IDI                                   | -               | 0.011(-0.002,0.037) | 0.14    | 0.018(-0.003,0.055) | 0.133   | -               | 0.009(-0.002,0.032) | 0.179   | 0.015(-0.005,0.049) | 0.186   |
| NRI (95%CI)                           | -               | 0.08(-0.055,0.223)  | -       | 0.076(0,0.227)      | -       | -               | 0.09(-0.066,0.188)  | -       | 0.064(-0.01,0.193)  | -       |
| Likelihood-ratio test, $\Delta\chi^2$ | -               | 1.311               | 0.25    | 7.225               | 0.007   | -               | 0.429               | 0.51    | 4.97                | 0.026   |
|                                       | Model 3         |                     |         |                     |         | Model 4         |                     |         |                     |         |
|                                       | Clinical        | Clinical + LVEF     | P value | Clinical + LVEDD    | P value | Clinical        | Clinical + LVEF     | P value | Clinical + LVEDD    | P value |
| <b>All-cause mortality</b>            |                 |                     |         |                     |         |                 |                     |         |                     |         |
| C-statistic                           | 0.68(0.63,0.73) | 0.70(0.66,0.74)     | -       | 0.70(0.66,0.75)     | -       | 0.70(0.65,0.74) | 0.71(0.67,0.76)     | -       | 0.71(0.67,0.76)     | -       |
| IDI (95%CI)                           | -               | 0.017(0.003,0.047)  | 0.020   | 0.041(0.014,0.072)  | <0.0001 | -               | 0.015(0.002,0.038)  | 0.007   | 0.037(0.011,0.069)  | <0.0001 |
| NRI (95%CI)                           | -               | 0.100(-0.021,0.236) | -       | 0.244(0.112,0.352)  | -       | -               | 0.129(0.007,0.248)  | -       | 0.243(0.091,0.320)  | -       |
| Likelihood-ratio test, $\Delta\chi^2$ | -               | 10.606              | 0.001   | 23.129              | <0.0001 | -               | 7.779               | 0.005   | 19.574              | <0.0001 |
| <b>Shock</b>                          |                 |                     |         |                     |         |                 |                     |         |                     |         |
| C-statistic                           | 0.66(0.61,0.70) | 0.66(0.62,0.70)     | -       | 0.66(0.61,0.70)     | -       | 0.66(0.62,0.70) | 0.66(0.62,0.71)     | -       | 0.66(0.62,0.71)     | -       |
| IDI (95%CI)                           | -               | 0.006(-0.007,0.028) | 0.319   | 0.014(-0.005,0.052) | 0.186   | -               | 0.005(-0.006,0.027) | 0.412   | 0.013(-0.006,0.044) | 0.140   |

|                                       |   |                     |      |                     |      |   |                     |      |                     |      |
|---------------------------------------|---|---------------------|------|---------------------|------|---|---------------------|------|---------------------|------|
| NRI (95%CI)                           | - | 0.095(-0.045,0.185) | -    | 0.103(-0.002,0.221) | -    | - | 0.102(-0.053,0.185) | -    | 0.136(-0.006,0.202) | -    |
| Likelihood-ratio test, $\Delta\chi^2$ | - | 0.941               | 0.33 | 6.603               | 0.01 | - | 0.597               | 0.44 | 5.814               | 0.02 |

CI, confidence interval; IDI, integrated discrimination index; LVEDD, left ventricular end-diastolic diameter; LVEF, left ventricular ejection fraction; NRI, net reclassification index.

Table S6. Interaction analysis for prediction of outcomes.

|                | LVEF            |                   | LVEDD           |                   |
|----------------|-----------------|-------------------|-----------------|-------------------|
|                | All-cause death | Appropriate shock | All-cause death | Appropriate shock |
| Indication     | 0.21            | 0.77              | 0.51            | 0.28              |
| ICM            | 0.09            | 0.99              | 0.34            | 0.79              |
| Sex            | 0.36            | 0.56              | 0.48            | 0.21              |
| Diabetes       | 0.60            | 0.36              | 0.59            | 0.95              |
| Hyperlipidemia | 0.10            | 0.06              | 0.07            | 0.42              |
| Digoxin        | 0.39            | 0.09              | 0.58            | 0.11              |
| Diuretic       | 0.47            | 0.52              | 0.47            | 0.85              |
| Amiodarone     | 0.38            | 0.43              | 0.88            | 0.30              |

ICM, ischemic cardiomyopathy; LVEDD, left ventricular end-diastolic diameter; LVEF, left ventricular ejection fraction.

Table S7. Prediction of all-cause mortality and appropriate shock using complete-case (N=535).

|                         | Model 4         |         |
|-------------------------|-----------------|---------|
|                         | HR (95%CI)      | P value |
| All-cause mortality     |                 |         |
| LVEF linear (per 10%)   | 0.78(0.63,0.96) | 0.020   |
| LVEDD linear (per 10mm) | 1.51(1.23,1.86) | <0.001  |
| Appropriate shock       |                 |         |
| LVEF trend              | 0.92(0.81,1.05) | 0.230   |
| LVEDD (per 10mm)        | 1.25(1.04,1.51) | 0.017   |

Model 4 for all-cause mortality adjusted for age, sex, BMI, systolic blood pressure, NYHA more than II class, the indication of ICD, CRBBB, AF, Diabetes, ICM, use of digoxin, diuretic and ACEI/ARB/ARNI, eGFR, albumin and NT-proBNP. Model 4 for appropriate shock further adjusted for smoking and alcohol.

AF, atrial fibrillation; ARNI, angiotensin receptor-neprilysin inhibitor; BMI, body mass index; CRBBB, complete right bundle branch block; eGFR, estimated glomerular filtration rate; HR, hazard ratio; ICD, implantable cardioverter defibrillator; ICM, ischemic cardiomyopathy; LVEDD, left ventricular end-diastolic diameter; LVEF, left ventricular ejection fraction.
